# Supplementary material
Source: ML conference proceedings conference paper supplement (https://proceedings.mlr.press/v31/lazic13a.html)
Supplement: Supplementary file 1 [file lazic13a-supp.pdf]

---

# Structural Expectation Propagation (SEP): Bayesian structure learning for networks with latent variables - supplementary material

---

Nevena Lazic  
Microsoft Research

Christopher M. Bishop  
Microsoft Research,  
Edinburgh University

John Winn  
Microsoft Research

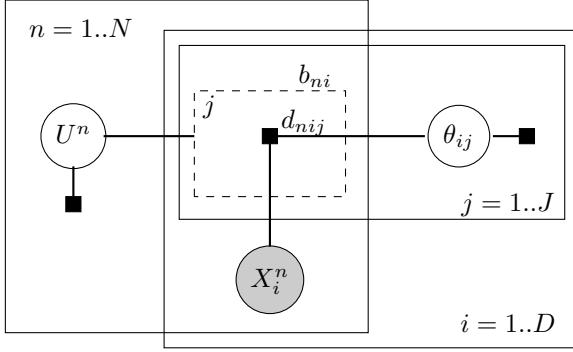

Figure 1: Gated factor graph corresponding to a discrete mixture model.

## 1 EP update derivations for a discrete mixture model

We first derive EP updates in a discrete mixture model where a discrete latent variable  $U \in \{1, \dots, J\}$  is the parent of  $D$  observed discrete variables  $X_1, \dots, X_D$ . We indicate the values taken on by random variables either by using lower-case symbols, or by writing  $X_i = x_i$ . Let  $\Theta_{ij}$  be the multinomial parameters for  $X_i$  conditioned on  $U = j$ , with Dirichlet priors  $p(\theta_{ij})$ , and let  $\Theta_i = \{\Theta_{i1}, \dots, \Theta_{iJ}\}$ . Given  $N$  observations  $\mathcal{D} = \{\mathbf{x}^1, \dots, \mathbf{x}^N\}$ , the joint distribution is:

$$p(u^{1:N}, \theta_1, \dots, \theta_D, \mathbf{x}^{1:N}) = \prod_n \prod_i p(u^n) p(\theta_i) b_{ni}(u^n, \theta_i, x_i^n) \quad (1)$$

$$b_{ni}(u^n, \theta_i, x_i^n) = \prod_j d_{nij}(\theta_{ij}, x_i^n)^{\delta(u^n=j)} \quad (2)$$

$$d_{nij}(\theta_{ij}, x_i^n) = \prod_l \theta_{ij,l}^{\delta(x_i^n=l)} \quad (3)$$

Under a factorized approximation, the posterior  $q(u^n)$  of each latent variable is the product of the prior and messages  $\mu_{ni}(u^n)$  from factors  $b_{ni}$ ,  $i = 1..D$ :

$$q(u^n) \propto p(u^n) \prod_i \mu_{ni}(u^n) \quad (4)$$

The posterior  $q(\theta_{ij})$  is the product of the prior  $p(\theta_{ij})$  and messages  $\tau_{nij}(\theta_{ij})$  from factors  $b_{ni}$ ,  $n = 1..N$ :

$$q(\theta_{ij}) = p(\theta_{ij}) \prod_n \tau_{nij}(\theta_{ij}) \quad (5)$$

Let  $q^{\setminus i}(u^n)$  be the posterior of  $u^n$  computed without the message  $\mu_{ni}(u^n)$ , and let  $q^{\setminus n}(\theta_{ij})$  be the posterior of  $\theta_{ij}$  computed without the message  $\tau_{nij}(\theta_{ij})$ .

The EP message from a factor  $b_{ni}$  to the variable  $U^n$  is:

$$\mu_{ni}(U^n = j) \propto \sum_{\theta_i} \left( \prod_{j'} q^{\setminus n}(\theta_{ij'}) \right) d_{nij}(\theta_{ij}, x_i^n) \quad (6)$$

$$\propto \sum_{\theta_{ij}} q^{\setminus n}(\theta_{ij}) d_{nij}(\theta_{ij}, x_i^n) \quad (7)$$

$$\propto E_{q^{\setminus n}(\theta_{ij})} [d_{nij}(\theta_{ij}, x_i^n)] \quad (8)$$

Expectations  $E_{q(\theta)} [d(x, \theta)]$  can be computed in closed form; when the Dirichlet distribution  $q(\theta)$  is parameterized by pseudocounts  $\lambda$  and  $\lambda_x$  is the pseudocount indexed by  $x$ ,  $E_{q(\theta)} [d(x, \theta)]$  evaluates to:

$$E_{q(\theta)} [d(x, \theta)] = \frac{\Gamma(\lambda_0)}{\Gamma(\lambda_0 + 1)} \frac{\Gamma(1 + \lambda_x)}{\Gamma(\lambda_x)} = \frac{\lambda_x}{\lambda_0}. \quad (9)$$

The EP message from  $b_{ni}$  to  $\theta_{ij}$  is:

$$\tau_{nij}(\theta_{ij}) = \frac{\text{proj}[\sum_{j'} q^{\setminus i}(U^n = j') r_{nij'}(\theta_{ij})]}{q^{\setminus n}(\theta_{ij})} \quad (10)$$

The quantities  $r_{nij'}(\theta_{ij})$  can be computed by considering the cases  $j = j'$  and  $j \neq j'$  separately:

$$\begin{aligned} r_{nij'}(\theta_{ij}) &= q^{\setminus n}(\theta_{ij}) \sum_{\theta_i \setminus \theta_{ij}} \left( \prod_{j^* \neq j} q^{\setminus n}(\theta_{ij^*}) \right) d_{nij'}(\theta_{ij'}, x_i^n) \\ &= \begin{cases} q^{\setminus n}(\theta_{ij}) d_{nij}(x_i^n, \theta_{ij}) & \text{if } j = j' \\ q^{\setminus n}(\theta_{ij}) E_{q^{\setminus n}(\theta_{ij'})} [d_{nij'}(\theta_{ij'}, x_i^n)] & \text{if } j \neq j'. \end{cases} \end{aligned} \quad (11)$$

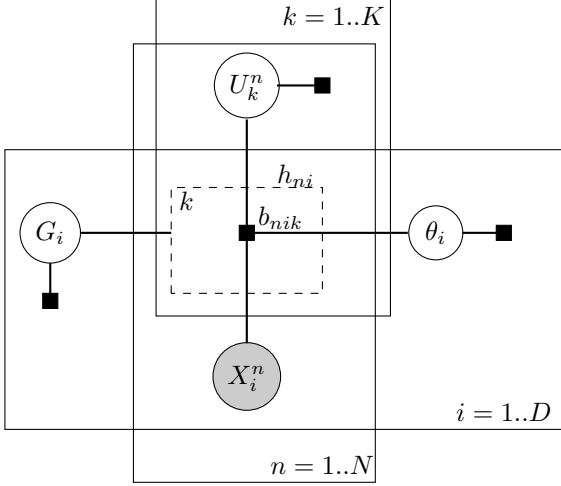

Figure 2: Gated factor graph for learning the structure of networks in which each observed variable  $X_i$  is the child of a single latent variable  $U_k$

## 2 EP update derivations for a single-parent network with latent structure

We now derive EP updates for a network in which there are  $K$  latent variables and  $D$  observed variables. Each observed variable is the child of a single latent variable (so there are up to  $K$  mixture models), but the network structure is otherwise unknown. Let  $\mathbf{X} = \{X_1, \dots, X_D\}$  and  $\mathbf{U} = \{U_1, \dots, U_K\}$  be the observed and latent variables, respectively. Let  $G_i \in \{1, \dots, K\}$  be a latent variable indicating the parent of  $X_i$  in the graph, and  $\mathbf{G} = \{G_1, \dots, G_D\}$ . Let  $\Theta_{ij}$  be the parameters for the conditional probability of  $X_i$  given that its parent variable takes on the value  $j$ . Given  $N$  observations  $\mathcal{D} = \{\mathbf{x}^1, \dots, \mathbf{x}^N\}$ , the posterior over the latent structure, variables and parameters is:

$$p(\mathbf{u}^{1:N}, \theta, \mathbf{g}, \mathbf{x}^{1:N}) = \prod_n \prod_i p(\mathbf{u}^n) p(g_i) p(\theta_i) h_{ni}(g_i, \mathbf{u}^n, \theta_i, x_i^n) \quad (12)$$

$$h_{ni}(g_i, \mathbf{u}^n, \theta_i, x_i^n) = \prod_k b_{nik}(u_k^n, \theta_i, x_i^n)^{\delta(g_i=k)} \quad (13)$$

$$b_{nik}(u_k^n, \theta_i, x_i^n) = \prod_j d_{nij}(\theta_{ij}, x_i^n)^{\delta(u_k^n=j)} \quad (14)$$

$$d_{nij}(\theta_{ij}, x_i^n) = \prod_l \theta_{ij,l}^{\delta(x_i^n=l)} \quad (15)$$

The model is shown in Figure 2, where we have collapsed the discrete mixture factors  $b_{nik}(u_k^n, \theta_i | x_i^n)$  for clarity.

We approximate the posterior by a factorized vari-

ational distribution  $q(\mathbf{g})q(\mathbf{u})q(\theta)$ , and we fit the parameters using expectation propagation. The posterior  $q(G_i = k)$  over each structure variable is the product of the prior and messages  $\gamma_{ni}(G_i = k)$ ,  $n = 1, \dots, N$  from factors  $h_{ni}$ :

$$q(G_i = k) \propto p(G_i = k) \prod_n \gamma_{ni}(G_i = k) \quad (16)$$

The posterior of each latent variable  $q(u_k^n)$  is the product of the prior and messages  $\nu_{nik}(u_k^n)$  from the factors  $h_{ni}$ ,  $i = 1..D$ .

$$q(u_k^n) \propto p(u_k^n) \prod_i \nu_{nik}(u_k^n) \quad (17)$$

Each parameter posterior  $q(\theta_{ij})$  is the product of the prior and messages  $\rho_{nij}(\theta_{ij})$  from factors  $h_{ni}$ ,  $n = 1..N$ :

$$q(\theta_{ij}) = p(\theta_{ij}) \prod_n \rho_{nij}(\theta_{ij}) \quad (18)$$

We denote by  $q^{\setminus i}(x)$  the approximate posterior of a variable  $x$  after removing the message indexed by  $i$ .

### 2.1 Messages from $h_{ni}$ to $G_i$

The posterior  $q(G_i = k)$  over each structure variable is the product of the prior and the messages  $\gamma_{ni}(G_i = k)$ ,  $n = 1..N$  from factors  $h_{ni}$ :

$$\begin{aligned} & \gamma_{ni}(G_i = k) \\ & \propto \sum_j \sum_{\theta_i} q^{\setminus i}(U_k^n = j) \left( \prod_{j'} q^{\setminus n}(\theta_{ij'}) \right) b_{nik}(j, \theta_i, x_i^n) \end{aligned} \quad (19)$$

$$\propto \sum_j q^{\setminus i}(U_k^n = j) \sum_{\theta_{ij}} q^{\setminus n}(\theta_{ij}) d_{nij}(\theta_{ij}, x_i^n) \quad (19)$$

$$\propto \sum_j q^{\setminus i}(U_k^n = j) E_{q^{\setminus n}(\theta_{ij})} [d_{nij}(x_i^n, \theta_{ij})]. \quad (20)$$

### 2.2 Messages from $h_{ni}$ to $U_k$

The posterior of each latent variable  $q(u_k^n)$  is the product of the prior and the messages  $\nu_{nik}(u_k^n)$  from factors  $h_{ni}(g_i, \mathbf{u}^n, \theta_i | x_i^n)$ ,  $i = 1..D$ .

$$\nu_{nik}(u_k^n) \propto \frac{\sum_{k'} q^{\setminus n}(G_i = k') r_{nik'}(u_k^n)}{q^{\setminus i}(u_k^n)} \quad (21)$$

$$\begin{aligned} r_{nik'}(u_k^n) &= q^{\setminus i}(u_k^n) \sum_{\mathbf{u}^n \setminus u_k^n} \sum_{\theta_i} \left( \prod_{k^* \neq k} q^{\setminus i}(u_{k^*}^n) \right) \\ & \times \left( \prod_{j'} q^{\setminus n}(\theta_{ij'}) \right) b_{nik'}(u_{k'}^n, \theta_i, x_i^n) \end{aligned} \quad (22)$$

When  $k' \neq k$ ,

$$\begin{aligned} r_{nik'}(U_k^n = j) &= q^{\setminus i}(U_k^n = j) \\ &\times \sum_{j'} q^{\setminus i}(U_{k'}^n = j') E_{q^{\setminus n}(\theta_{ij'})} [d_{nij'}(\theta_{ij'} | x_i^n)] \end{aligned} \quad (23)$$

When  $k' = k$ ,

$$\begin{aligned} r_{nik'}(U_k^n = j) &= q^{\setminus i}(U_k^n = j) \sum_{\theta_i} b_{nik}(j, \theta_i, x_i^n) \\ &= q^{\setminus i}(U_k^n = j) E_{q^{\setminus n}(\theta_{ij})} [d_{nij}(\theta_{ij}, x_i^n)] \end{aligned} \quad (24)$$

### 2.3 Messages from $h_{ni}$ to $\theta_{ij}$

Each parameter posterior distribution  $q(\theta_{ij})$  is computed as the product of the prior and the messages  $\rho_{nij}(\theta_{ij})$  from factors  $h_{ni}(g_i, \mathbf{u}^n, \theta_i, x_i^n)$ ,  $n = 1..N$ :

$$\rho_{nij}(\theta_{ij}) = \frac{\text{proj}[\sum_k q^{\setminus n}(G_i = k) s_{nik}(\theta_{ij})]}{q^{\setminus n}(\theta_{ij})} \quad (25)$$

The message  $\rho_{nij}(\theta_{ij})$  is a weighted average of Dirichlet messages, projected onto a Dirichlet distribution with matching moments. The terms  $s_{nik}(\theta_{ij})$  are EP messages in a discrete mixture model where  $U_k$  is the parent of  $X_i$ . Each  $s_{nik}(\theta_{ij})$  is a moment-matched weighted average two Dirichlet distributions, for the two cases where  $U_k^n = j$  and  $U_k^n \neq j$ :

$$s_{nik}(\theta_{ij}) = \text{proj}[\hat{s}_{nik}(\theta_{ij})] \quad (26)$$

$$\begin{aligned} \hat{s}_{nik}(\theta_{ij}) &= q^{\setminus n}(\theta_{ij}) \sum_{u_k^n} \sum_{\theta_i \setminus \theta_{ij}} q^{\setminus i}(u_k^n) \\ &\times \left( \prod_{j^* \neq j} q^{\setminus n}(\theta_{ij^*}) \right) b_{nik}(u_k^n, \theta_i, x_i^n) \end{aligned} \quad (27)$$

$$\begin{aligned} &= q^{\setminus n}(\theta_{ij}) q^{\setminus i}(U_k^n = j) d_{nij}(\theta_{ij}, x_i^n) \\ &+ q^{\setminus n}(\theta_{ij}) \sum_{j' \neq j} q^{\setminus i}(U_k^n = j') E_{q^{\setminus n}(\theta_{ij'})} [d_{nij'}(\theta_{ij'}, x_i^n)] \end{aligned} \quad (28)$$
